# Supplementary material for: 体液量調節はどのように行われているか (輸液療法パーフェクト) -- (体液量と電解質濃度の調節を考える)
Source: Royal Society of Chemistry journal article supplement (doi:10.1039/d1ra06325a), 2009-04-01

## Supplementary Information (SI)

### **Promotional mechanism of enhanced denitration activity with Cu modification in Ce/TiO<sub>2</sub>-ZrO<sub>2</sub> catalyst for low temperature NH<sub>3</sub>-SCR system**

Wei Zhang <sup>a,b</sup>, Yunhao Tang <sup>a,b</sup>, Wei Xiao <sup>a,b</sup>, Min Ruan <sup>a,b</sup>, Yanshan Yin <sup>a,b</sup>, Quanbin Song <sup>a,b</sup>, Kang Xie <sup>a,b</sup>, Chuan Qin <sup>a,b</sup>, Mengyao Dong <sup>a,b</sup>, Yunhe Zhou <sup>a,b</sup>, Jie Li <sup>a,b</sup>

<sup>a</sup> College of Energy and Power Engineering, Changsha University of Science & Technology, Changsha, 410114, China

<sup>b</sup> Key Laboratory of Renewable Energy Electric-Technology of Hunan Province, Changsha, 410114, China

**Fig. S1** Optimized structures of the intermediates and the transition states for  $\text{NH}_3$  dehydrogenation reaction on the Cu atoms. The bond lengths are given in Å.

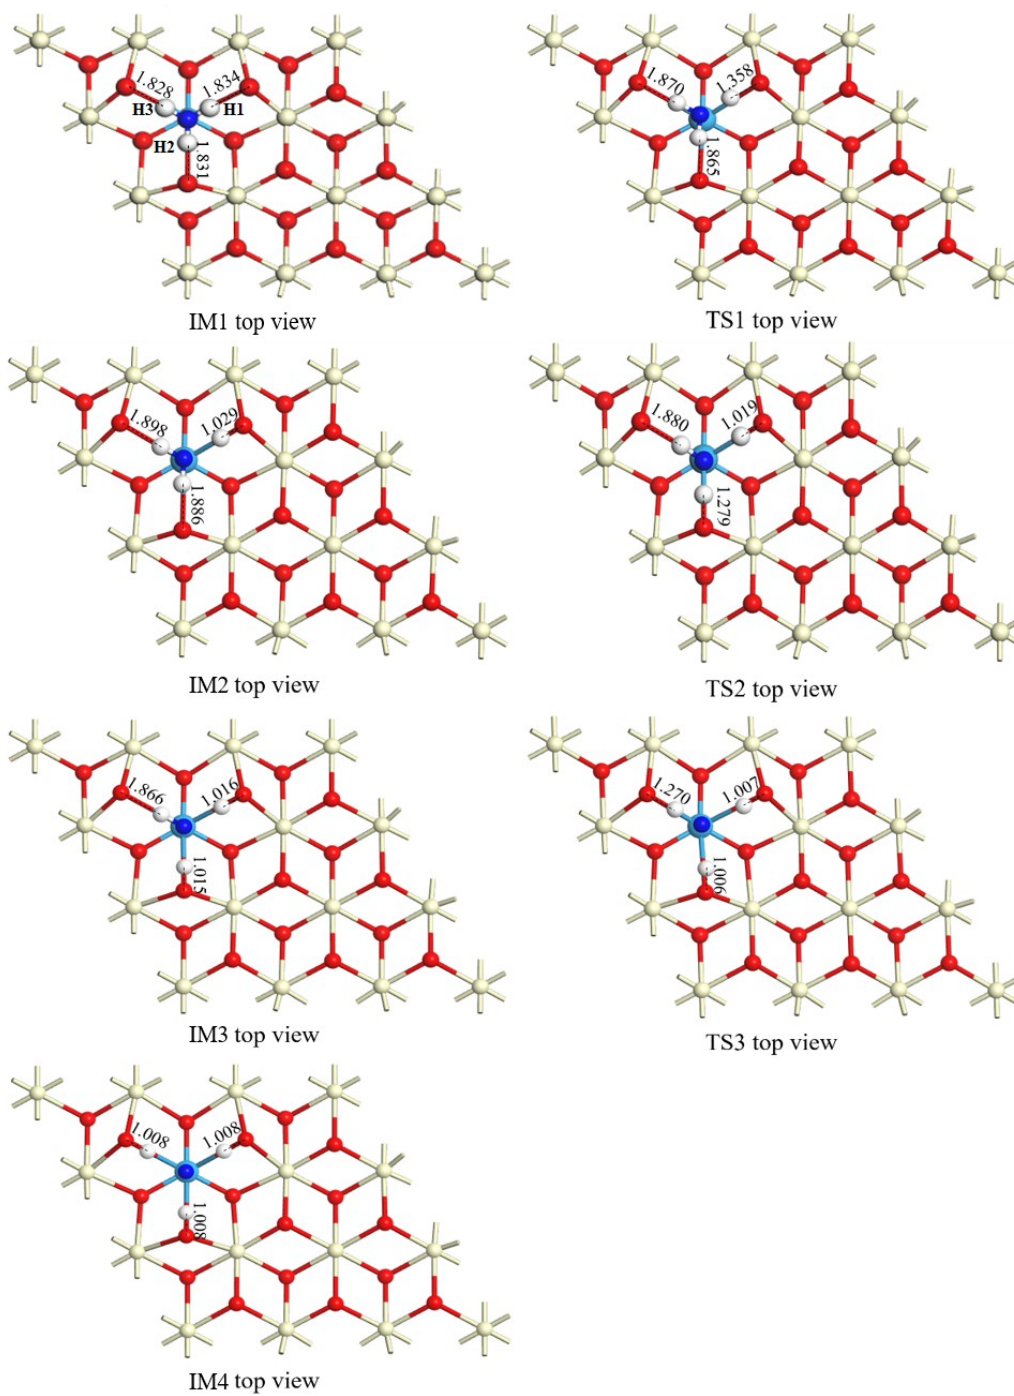

**Fig. S2** Optimized structures (top view) of NO adsorptions on (a) Cu-NH<sub>2</sub>, (b) Cu-NH, (c) Cu-N, (d) NH<sub>2</sub>-Cu-OH, (e) NH<sub>2</sub>-Cu-O. The bond lengths are given in Å.

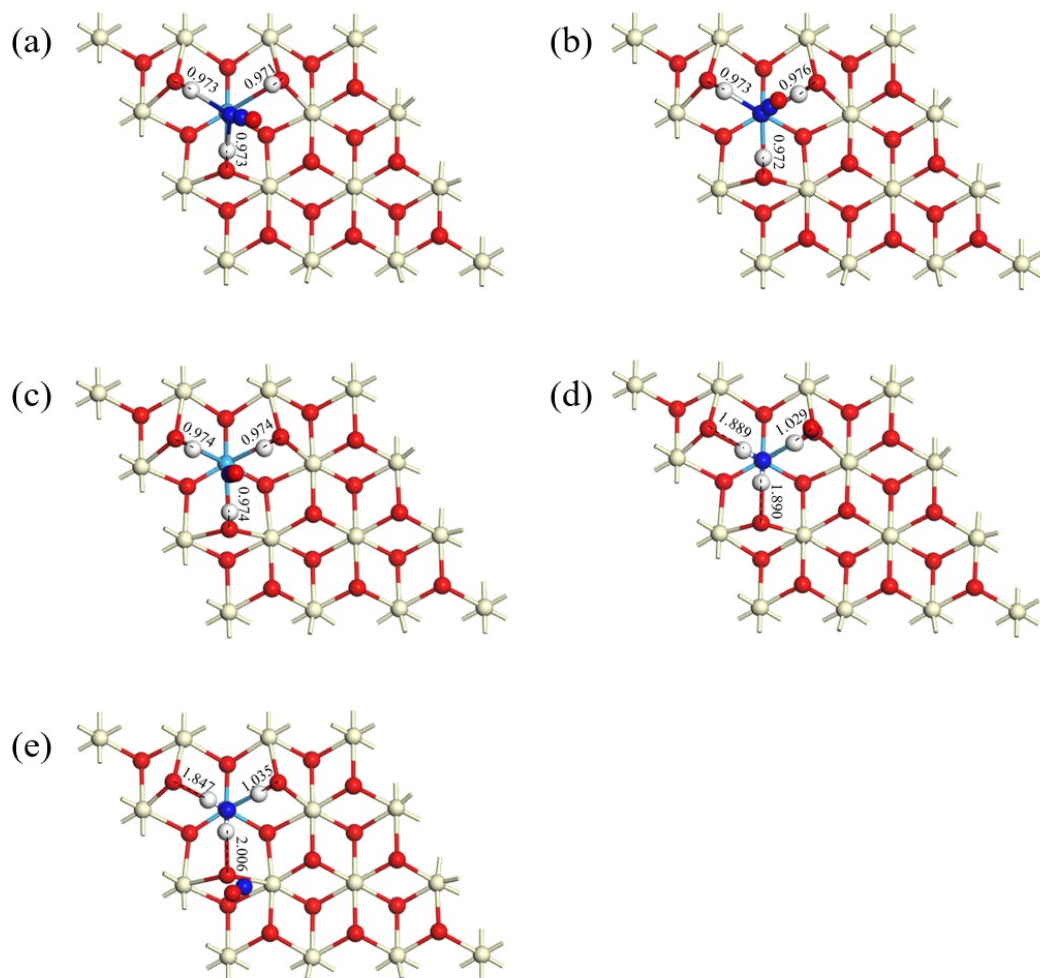

Supplement: d1ra06325a1.pdf [file d1ra06325a1.pdf]
